# Supplementary material for: The coiled-coil protein carrier structure affects the activation of certain endocytosis pathways
Source: Royal Society of Chemistry journal article supplement (doi:10.1039/d4ra07763f), 2025-01-01
Supplement: d4ra07763f1.pdf [file d4ra07763f1.pdf]

Supplementary information

# The Coiled-Coil Protein Carrier Structure Affects Their Activation of Certain Endocytosis Pathways

Ken-Ichi Sano <sup>1,2,\*</sup>, and Yuta Nomata <sup>2</sup>

<sup>1</sup>Department of Applied Chemistry, Faculty of Fundamental Engineering, Nippon Institute of Technology, Miyashiro, Saitama 345-8501, Japan; [kisano@nit.ac.jp](mailto:kisano@nit.ac.jp)

<sup>2</sup>Graduate School of Environmental Symbiotic System Major, Nippon Institute of Technology, Miyashiro, Saitama 345-8501, Japan.

\*Correspondence: [kisano@nit.ac.jp](mailto:kisano@nit.ac.jp); Tel.: +81-480-33-7725

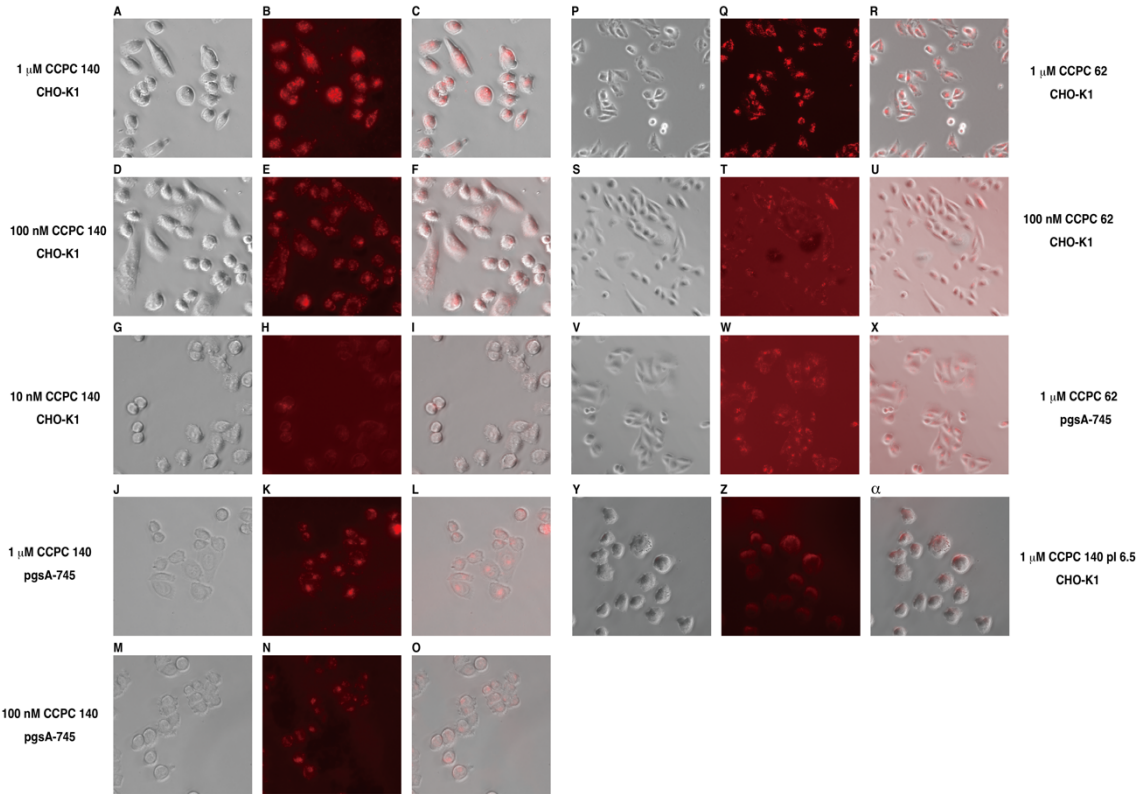

**Figure S1.** Microscopic observations of the cell-penetrating activity of Alexa Fluor 532-labeled CCPCs against CHO-K1 and *pgsA-745*. Panels A-O and P-R show the results for CCPC 140, CCPC 62 and CCPC 140 pI 6.5-administered cells, respectively. A, D, G, J, M, P, S, V, and Y show phase-contrast images; B, E, H, K, N, Q, T, W, and Z show fluorescent images; C, F, I, L, O, R, U, X, and  $\alpha$  show the merged images. All fluorescence images were given pseudo-color, and the levels were tuned by imaging software for visualization.

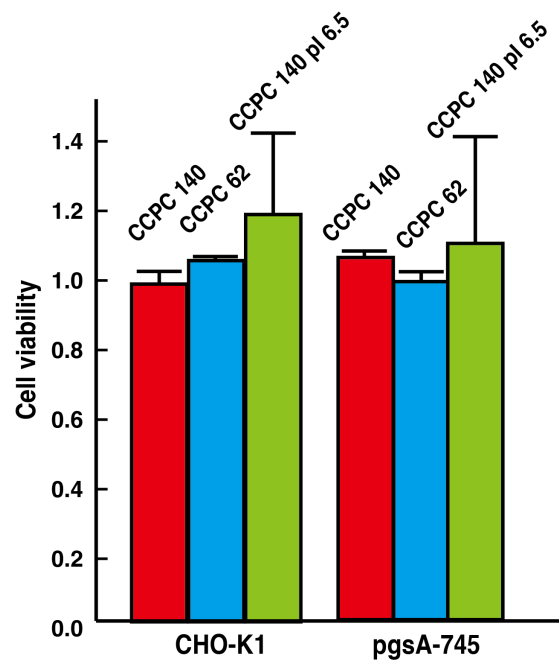

**Figure S2.** Cytotoxicity of CCPCs using in this study. Cells were incubated with 1  $\mu$ M of CCPC 140 (red), CCPC 62 (blue) and CCPC 140 pI6.5 (green), respectively. Data from four independent measurements were averaged.

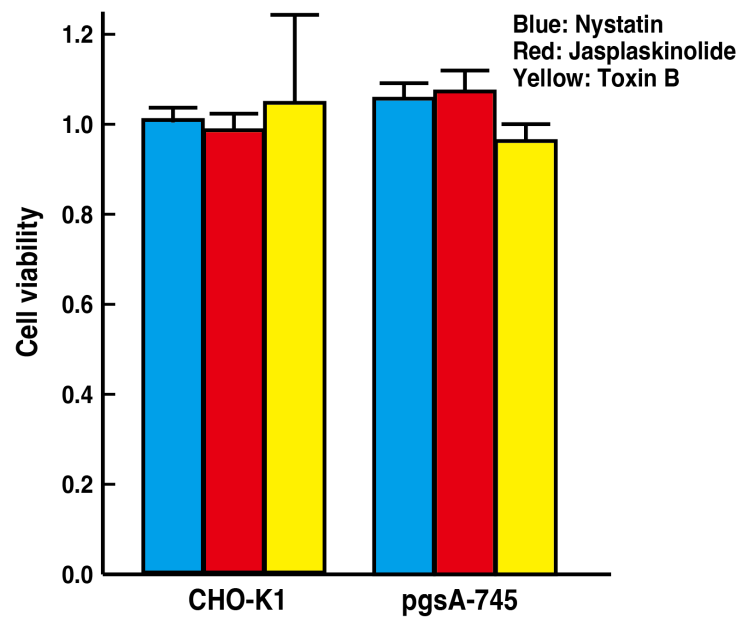

**Figure S3.** Cytotoxicity of endocytic inhibitors using in this study. Cells were treated with nystatin (blue), jasplakinolide (red) and toxin B (yellow). Data from three or four independent measurements were averaged.
